# Supplementary material for: Bactericidal Effect of Clove Oil against Multidrug-Resistant Streptococcus suis Isolated from Human Patients and Slaughtered Pigs
Source: MDPI journal article supplement (doi:10.3390/pathogens9010014), 2019-12-21
Supplement: s1 [file s1]

| <i>S. suis</i><br>MNCM06 | Time (min) | Bacterial count (log cfu/mL) |       |       |         |       |                |
|--------------------------|------------|------------------------------|-------|-------|---------|-------|----------------|
|                          |            | #1                           | #2    | #3    | average | STDEV | Standard Error |
| pH4                      | 0          | 5.176                        | 5.180 | 5.180 | 5.179   | 0.002 | 0.001          |
|                          | 5          | 3.180                        | 3.180 | 3.146 | 3.169   | 0.020 | 0.011          |
|                          | 10         | 2.000                        | 2.000 | 2.000 | 2.000   | 0.000 | 0.000          |
|                          | 15         | 0.000                        | 0.000 | 0.000 | 0.000   | 0.000 | 0.000          |
|                          | 30         | 0.000                        | 0.000 | 0.000 | 0.000   | 0.000 | 0.000          |
|                          | 60         | 0.000                        | 0.000 | 0.000 | 0.000   | 0.000 | 0.000          |
| pH5.5                    | 0          | 5.114                        | 5.146 | 5.130 | 5.130   | 0.016 | 0.009          |
|                          | 5          | 3.826                        | 3.810 | 3.810 | 3.815   | 0.009 | 0.005          |
|                          | 10         | 2.180                        | 2.200 | 2.180 | 2.187   | 0.012 | 0.007          |
|                          | 15         | 0.000                        | 0.000 | 0.000 | 0.000   | 0.000 | 0.000          |
|                          | 30         | 0.000                        | 0.000 | 0.000 | 0.000   | 0.000 | 0.000          |
|                          | 60         | 0.000                        | 0.000 | 0.000 | 0.000   | 0.000 | 0.000          |
| pH7                      | 0          | 5.398                        | 5.410 | 5.398 | 5.402   | 0.007 | 0.004          |
|                          | 5          | 3.672                        | 3.672 | 3.680 | 3.675   | 0.005 | 0.003          |
|                          | 10         | 2.380                        | 2.380 | 2.380 | 2.380   | 0.000 | 0.000          |
|                          | 15         | 0.000                        | 0.000 | 0.000 | 0.000   | 0.000 | 0.000          |
|                          | 30         | 0.000                        | 0.000 | 0.000 | 0.000   | 0.000 | 0.000          |
|                          | 60         | 0.000                        | 0.000 | 0.000 | 0.000   | 0.000 | 0.000          |
| pH8                      | 0          | 5.447                        | 5.407 | 5.412 | 5.422   | 0.022 | 0.013          |
|                          | 5          | 3.750                        | 3.756 | 3.750 | 3.752   | 0.003 | 0.002          |
|                          | 10         | 2.300                        | 2.300 | 2.316 | 2.305   | 0.009 | 0.005          |
|                          | 15         | 0.000                        | 0.000 | 0.000 | 0.000   | 0.000 | 0.000          |
|                          | 30         | 0.000                        | 0.000 | 0.000 | 0.000   | 0.000 | 0.000          |
|                          | 60         | 0.000                        | 0.000 | 0.000 | 0.000   | 0.000 | 0.000          |
