# Supplementary material for: Bactericidal Effect of Clove Oil against Multidrug-Resistant Streptococcus suis Isolated from Human Patients and Slaughtered Pigs
Source: MDPI journal article supplement (doi:10.3390/pathogens9010014), 2019-12-21
Supplement: s1 [file s1]

| <i>S. suis</i> MNCM06 | Time (min) | Bacterial count (log cfu/mL) |       |       |         |       |
|-----------------------|------------|------------------------------|-------|-------|---------|-------|
|                       |            | #1                           | #2    | #3    | Average | SD    |
| Control               | 0          | 6.650                        | 6.660 | 6.600 | 6.637   | 0.032 |
|                       | 5          | 6.600                        | 6.620 | 6.640 | 6.620   | 0.020 |
|                       | 10         | 6.580                        | 6.600 | 6.610 | 6.597   | 0.015 |
|                       | 15         | 6.540                        | 6.480 | 6.560 | 6.527   | 0.042 |
|                       | 30         | 6.460                        | 6.470 | 6.460 | 6.463   | 0.006 |
|                       | 60         | 6.320                        | 6.410 | 6.380 | 6.370   | 0.046 |
| Treated               | 0          | 5.900                        | 5.900 | 5.900 | 5.900   | 0.000 |
|                       | 5          | 3.450                        | 3.460 | 3.410 | 3.440   | 0.026 |
|                       | 10         | 2.040                        | 2.000 | 2.040 | 2.027   | 0.023 |
|                       | 15         | 0.000                        | 0.000 | 0.000 | 0.000   | 0.000 |
|                       | 30         | 0.000                        | 0.000 | 0.000 | 0.000   | 0.000 |
|                       | 60         | 0.000                        | 0.000 | 0.000 | 0.000   | 0.000 |
